# Supplementary material
Source: publisher site journal article supplement (https://www.spandidos-publications.com/6168/downloadSupplementary)

Figure S1. Expression of Bif-1 is increased in LPS-treated NIH mice. (A) Protein levels of Bif-1 were measured using western blotting. Mice in the LPS group were injected with LPS (10 mg/kg) and induced for 4 h. Mice in the Con group were injected with physiological saline (10 mg/kg) and induced for 4 h. (B) Quantification of Bif-1 protein levels in the LPS-treated and control groups. Data are expressed as mean  $\pm$  SD (n=3).  $P<0.05$  was considered to indicate a statistically significant difference (vs. Con). Con, control group; LPS, LPS-treated group; LPS, lipopolysaccharide; NIH, National Institutes of Health; Bif-1, Bax-interacting factor 1.

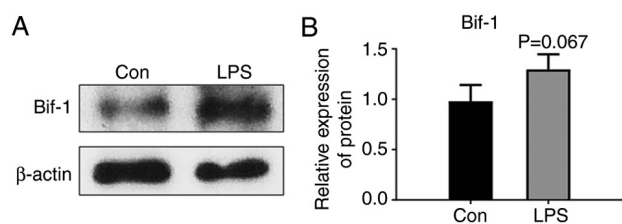

Supplement: Supplementary file 1 [file downloadSupplementary]
